# Supplementary material
Source: PubMed Central journal article supplement (PMC10992356)
Supplement: 262_2020_2686_MOESM1_ESM.pdf [file 262_2020_2686_MOESM1_ESM.pdf]

Supplementary  
Figure 1A

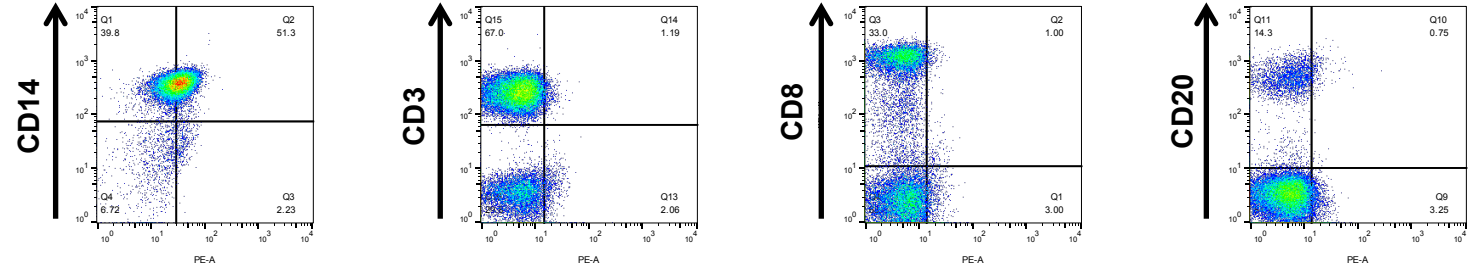

Isotype controls

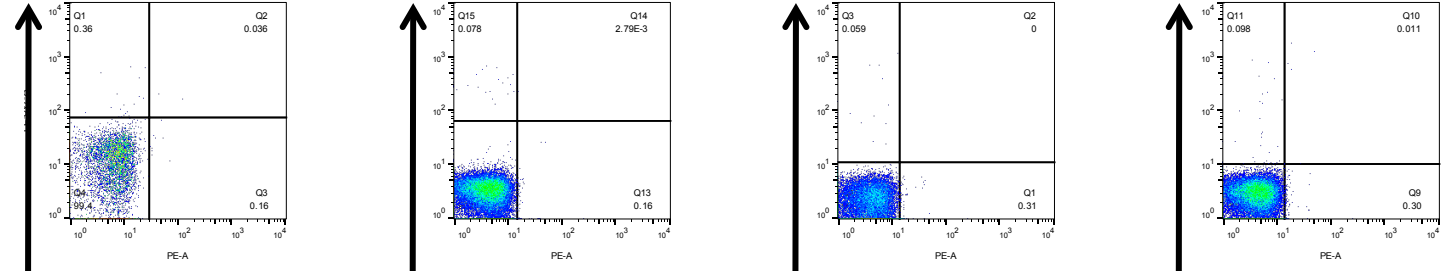

Single stain samples

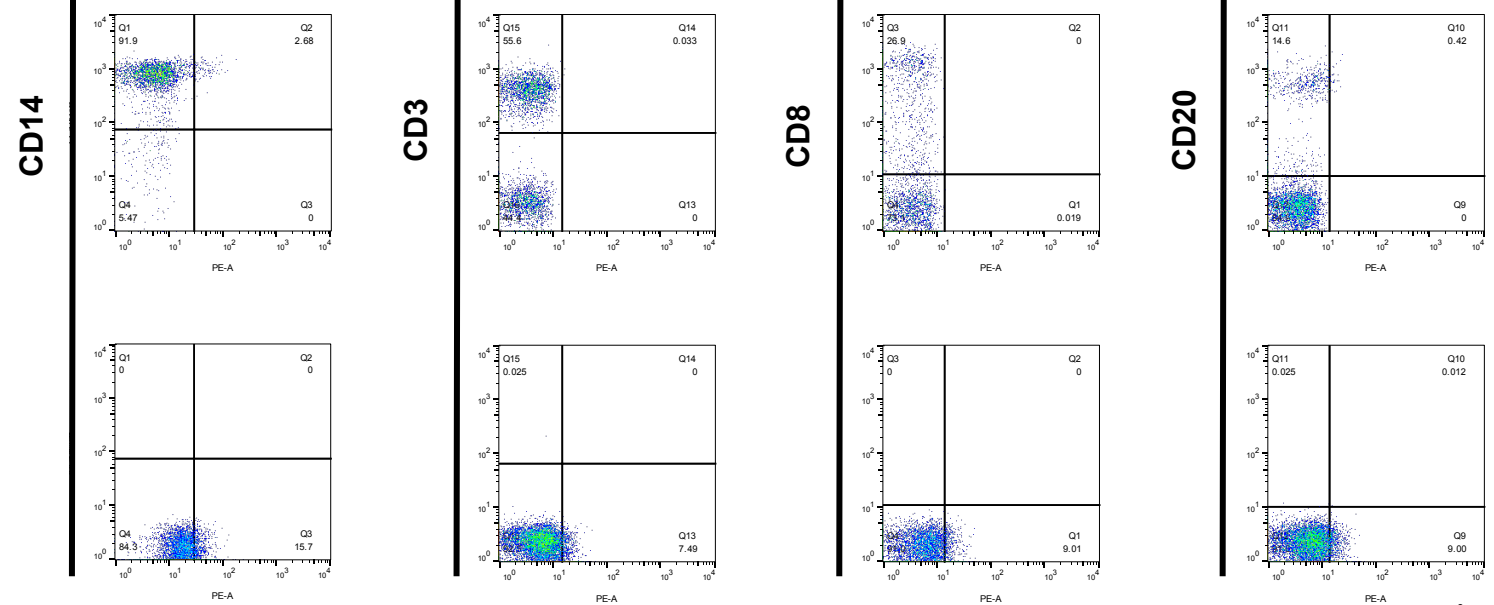

PD-L1

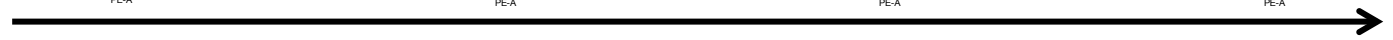

# Supplementary Figure 1B

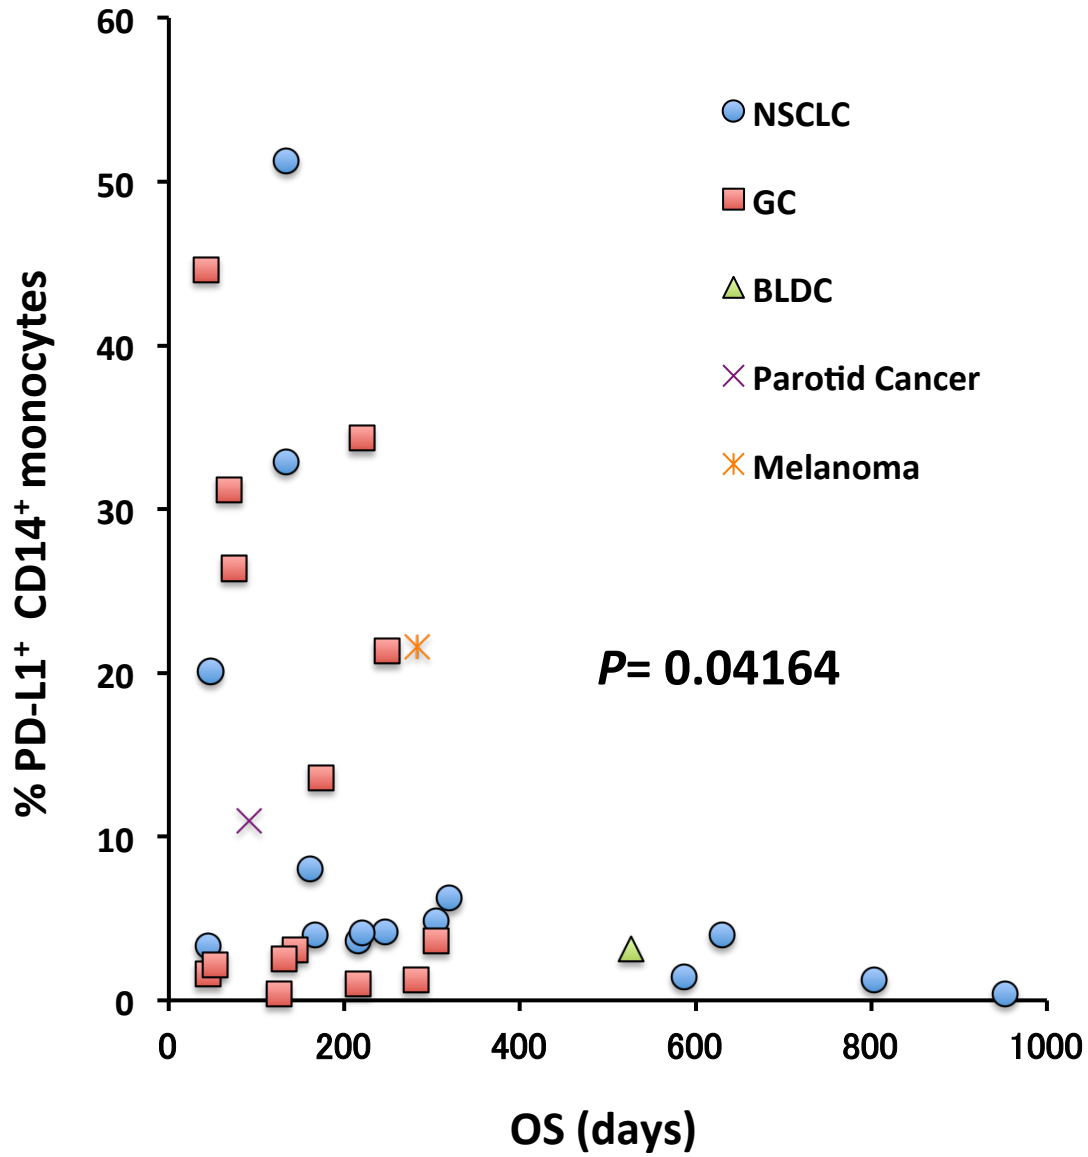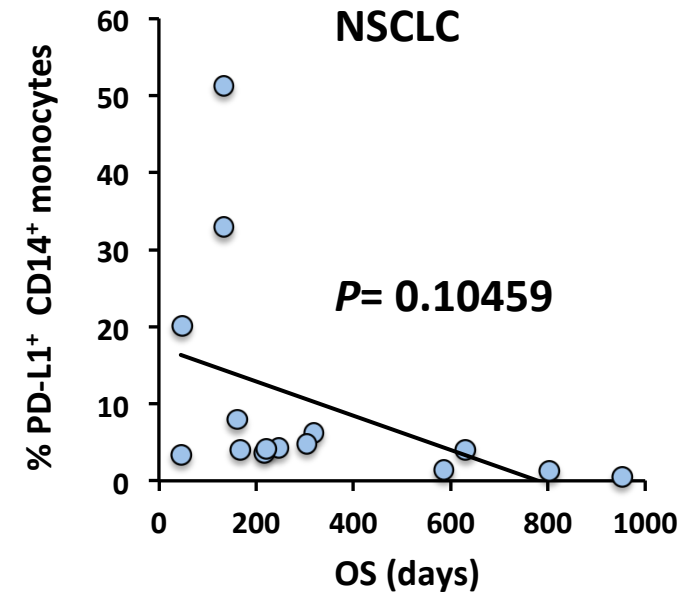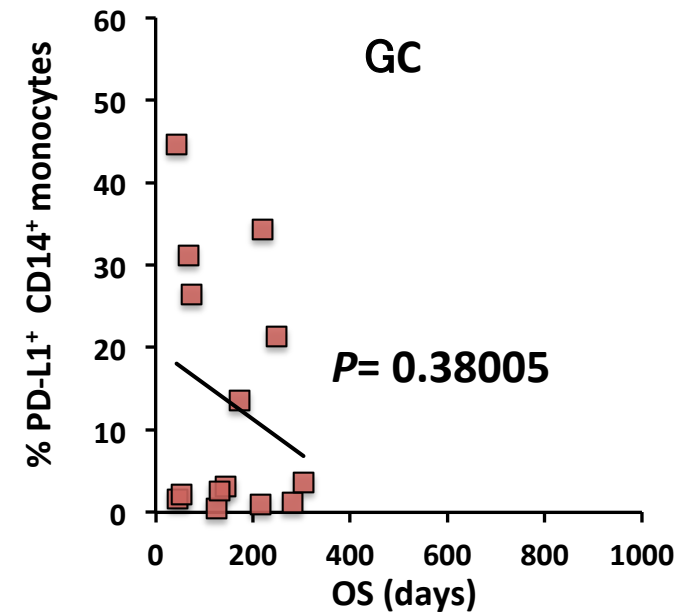

## Supplementary Figure Legends

**Supplementary Figure 1.** *A schematic representation of compensation strategy for PD-L1 expressing lymphocyte and monocyte subpopulations and association with PD-L1 expressing CD14<sup>+</sup> monocytes and overall survival (OS). (A)*

Compensation based on single-stained samples and isotype controls (*lower panels*) for determination of the gates in Figure

2. Upper panels show the same samples in Figure 2. (B) Association between PD-L1<sup>+</sup> CD14<sup>+</sup> monocytes and OS. Each dot

represents one specimen from a total of 32 patients with the indicated five types of cancers listed in Table II and

Supplementary Table II. BLDC: Bladder cancer; GC: gastric cancer; ICI: immune checkpoint inhibitor; NSCLC: non-small cell

lung cancer.

# Supplementary Figure 2A

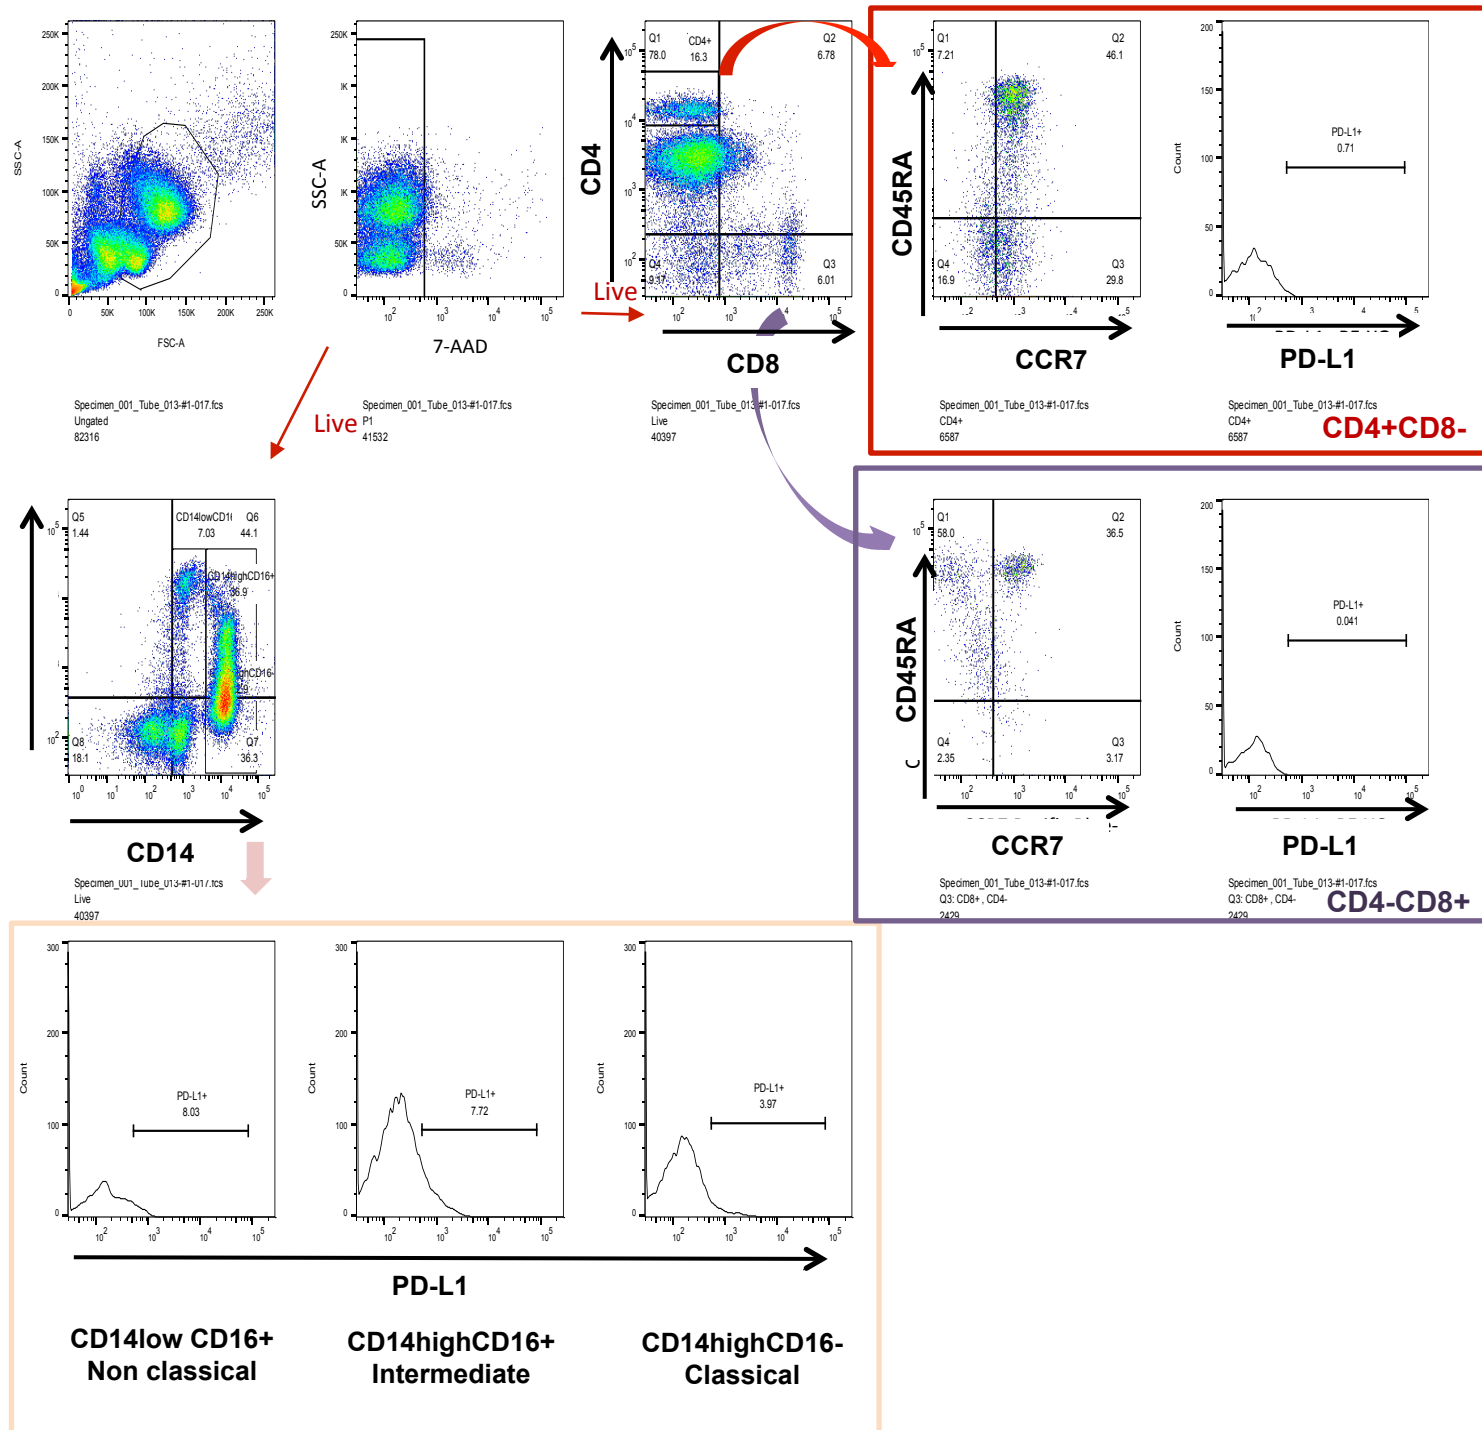

# Supplementary Figure 2B

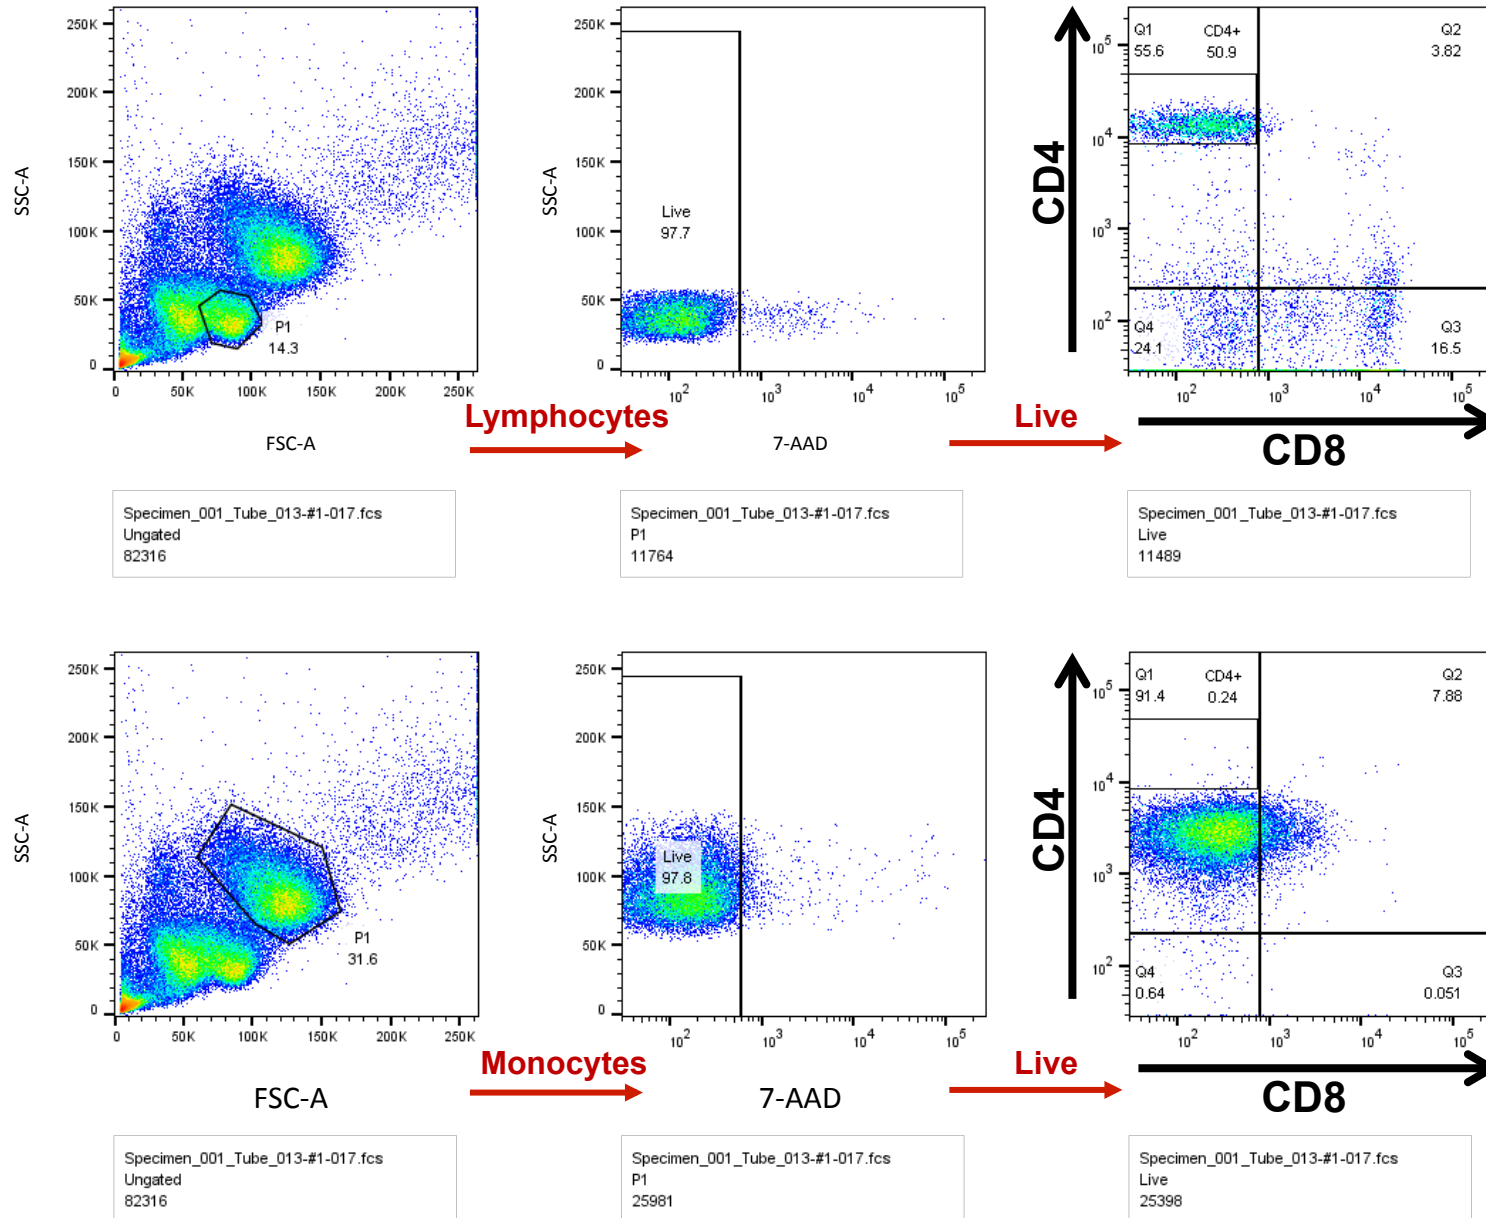

Supplementary  
Figure 2C

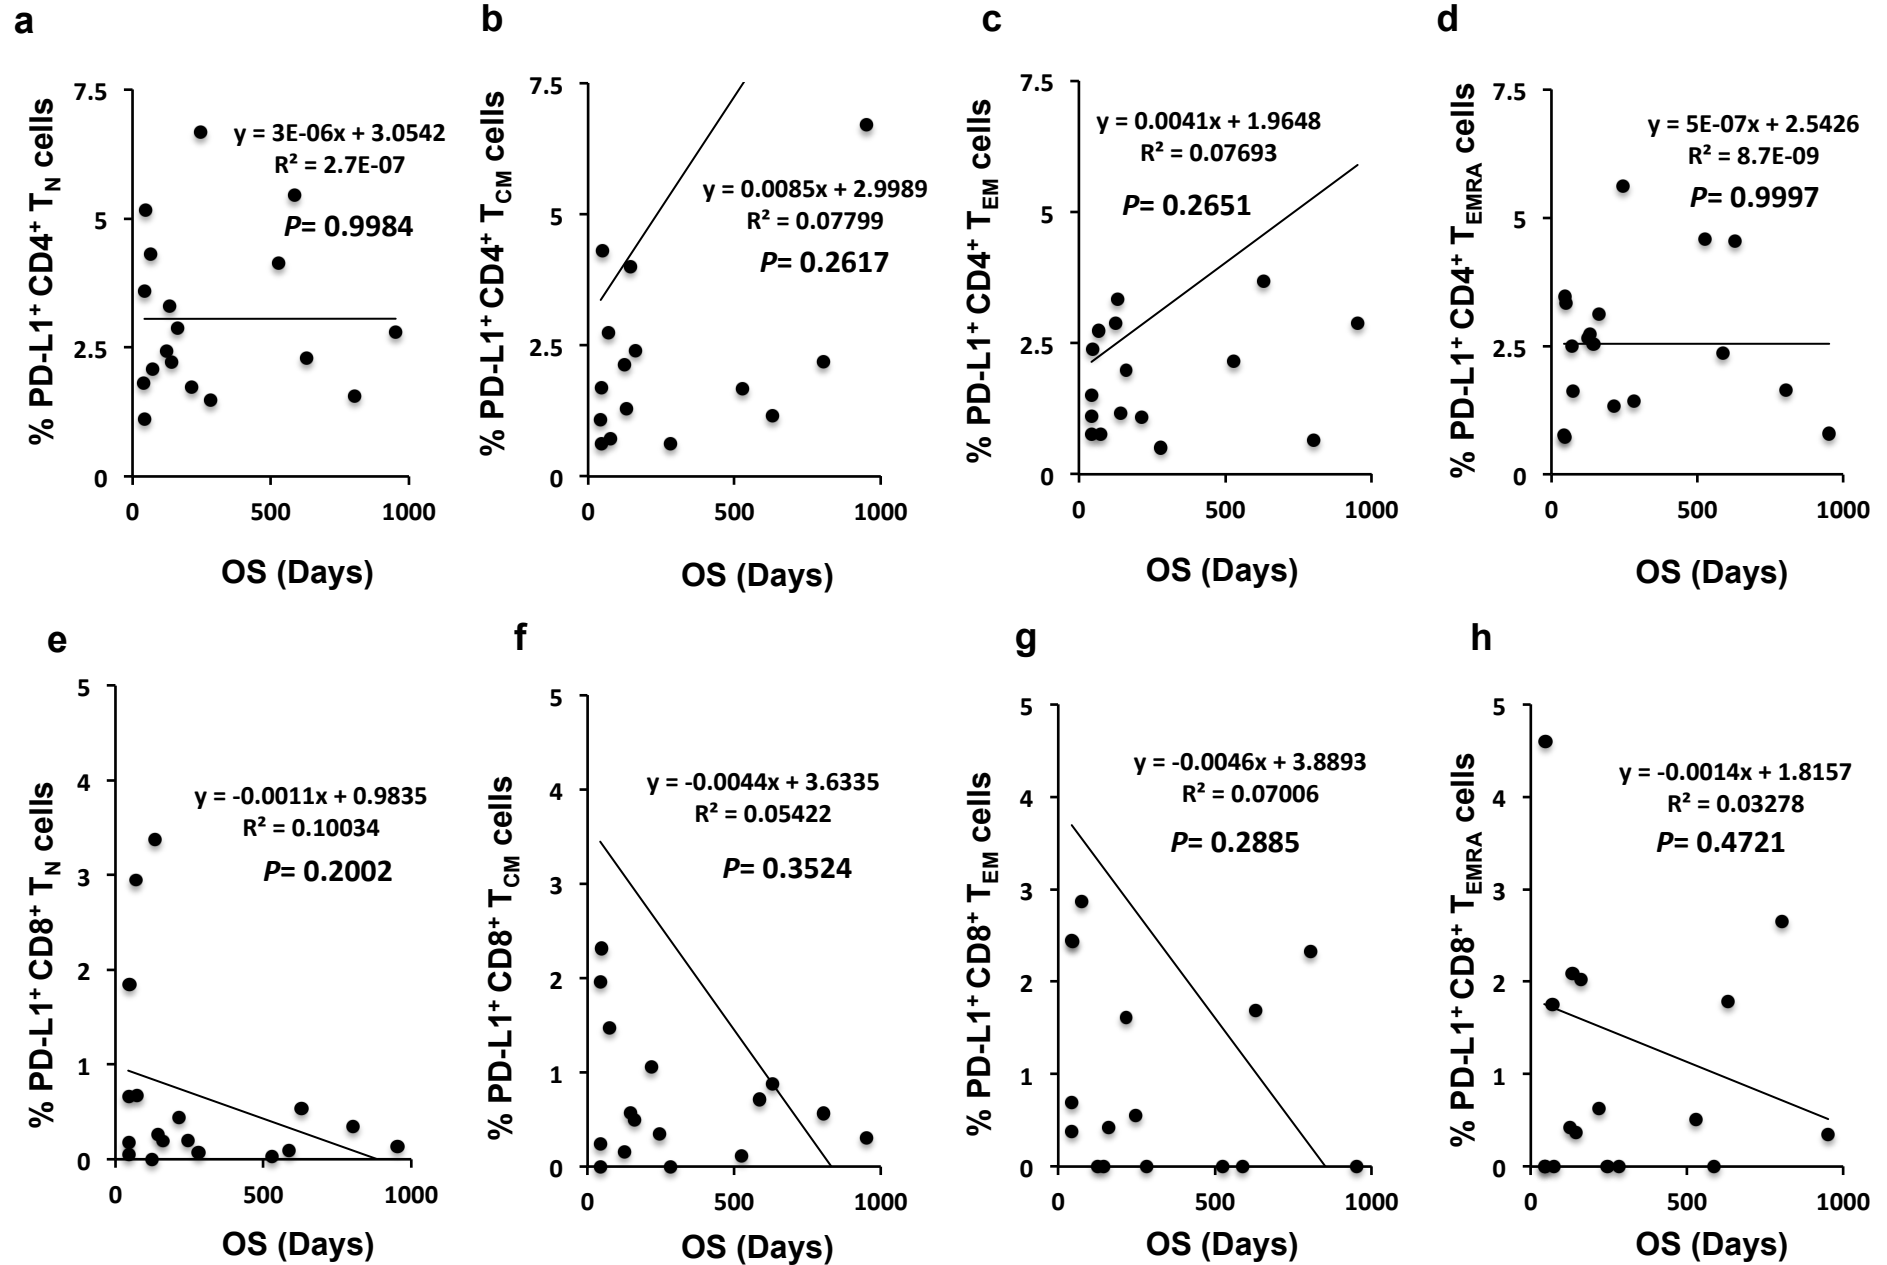

Supplementary  
Figure 2D

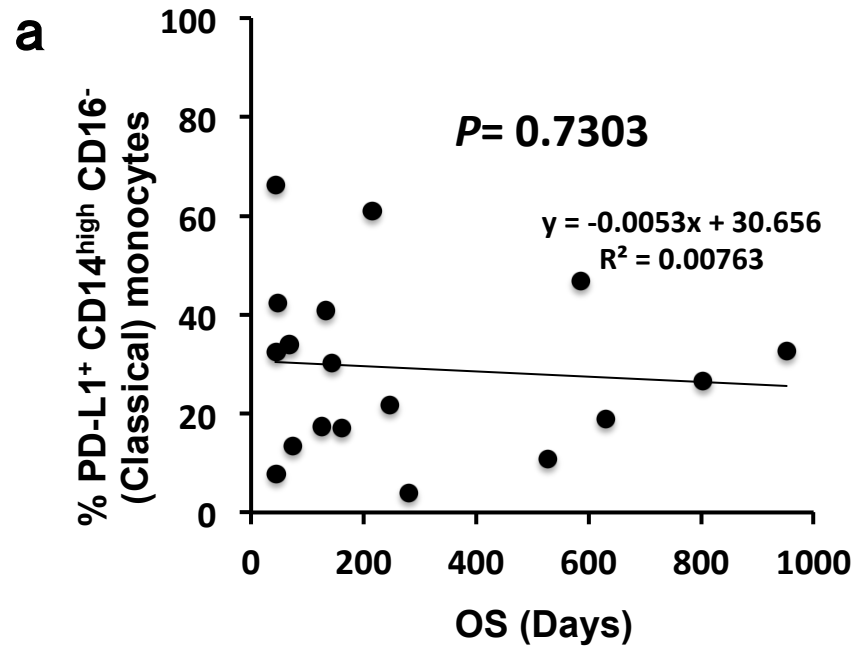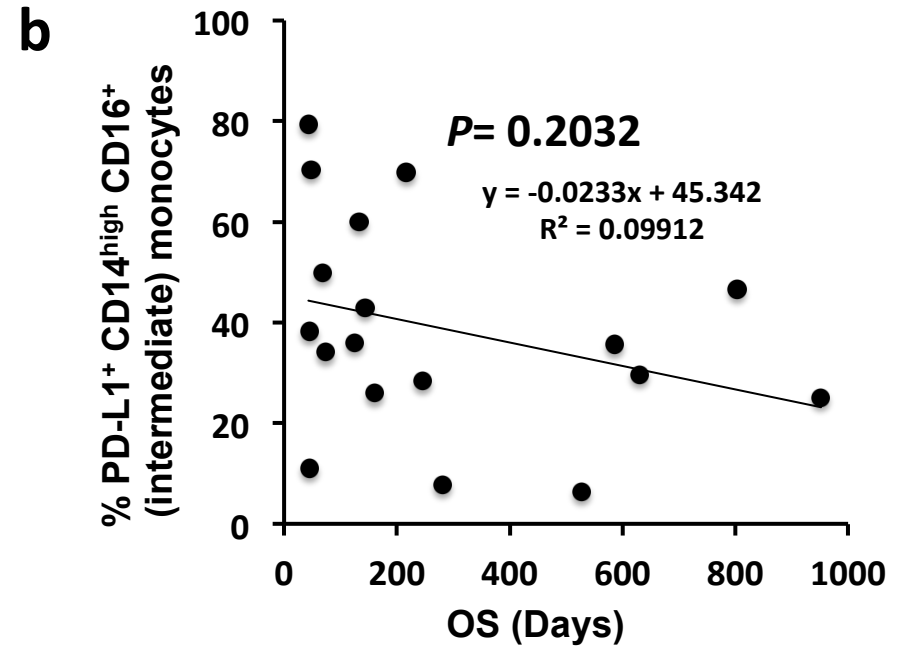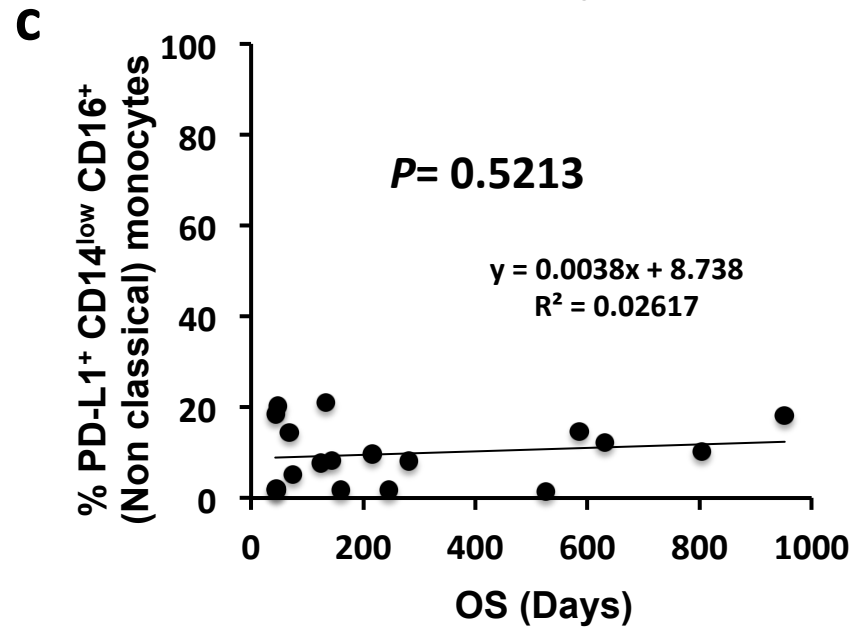

**Supplementary Figure 2.** *A gating strategy for PD-L1 expressing lymphocyte or monocyte subpopulations and association between the subpopulations and overall survival (OS).* (A) CD14<sup>+</sup> cells were divided into three subgroups, classical (CD14<sup>high</sup> CD16<sup>-</sup>) intermediate (CD14<sup>high</sup> CD16<sup>+</sup>) and non-classical (CD14<sup>low</sup> CD16<sup>+</sup>) monocyte subsets. CD4<sup>+</sup> lymphocytes or CD8<sup>+</sup> cells were classified into four subsets, naïve (CD45RA<sup>+</sup>CCR7<sup>+</sup>), central memory (CD45RA<sup>-</sup>CCR7<sup>+</sup>), effector memory (CD45RA<sup>-</sup>CCR7<sup>-</sup>), and terminal differentiated effector memory (CD45RA<sup>+</sup>CCR7<sup>-</sup>) T cell subsets. (B) A representative CD4<sup>high</sup> CD8<sup>-</sup> subset in (A) was included in lymphocytes, whereas the CD4<sup>low</sup> CD8<sup>-</sup> subset was included in monocytes. (C) Association between the percentage of peripheral PD-L1<sup>+</sup> CD4<sup>+</sup> T cell subsets and PD-L1<sup>+</sup> CD8<sup>+</sup> T cell subsets regarding naïve, central memory, effector memory, or terminally differentiated effector memory T cells (**a** and **e**, **b** and **f**, **c** and **g**, or **d** and **h**, respectively) and OS. Each dot represents one specimen from 18 patients. (D) Association between the percentages of peripheral PD-L1<sup>+</sup> classical monocytes, PD-L1<sup>+</sup> intermediate monocytes, or non-classical monocytes (**a**, **b** or **c**) and OS.



# Supplementary Figure 3

Case 22

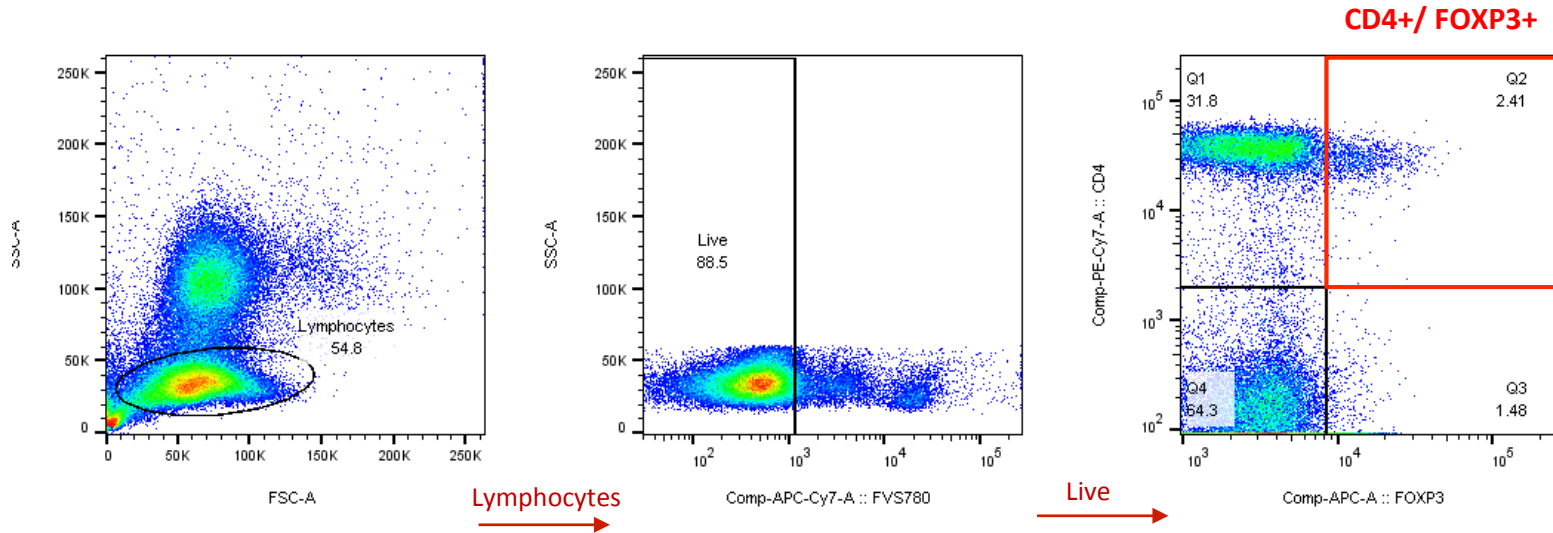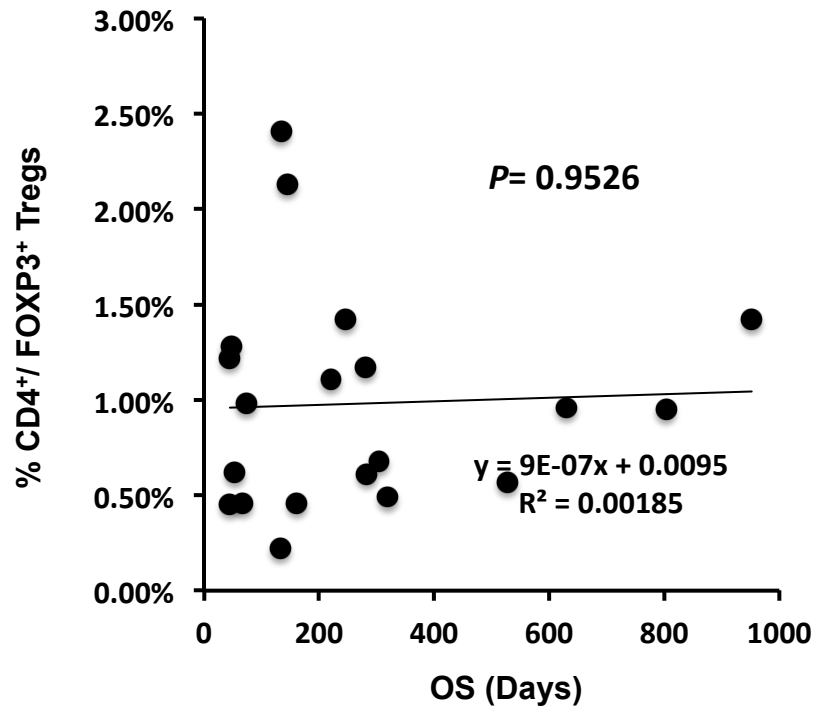

**Supplementary Figure 3.** *Linear correlation between CD4+/FOXP3+ regulatory T cells (Tregs) and overall survival (OS).*

(A) Gating strategies for CD4+/FOXP3+ Tregs. (B) Association between the percentage of CD4+/FOXP3+ Tregs and OS.

Each dot represents one specimen from a total of 20 patients listed in Supplementary Table III.

| Case no. | PD-L1 <sup>+</sup> CD4 <sup>+</sup> |                           |                           |                             | PD-L1 <sup>+</sup> CD8 <sup>+</sup> |                           |                           |                             | OS (days) |
|----------|-------------------------------------|---------------------------|---------------------------|-----------------------------|-------------------------------------|---------------------------|---------------------------|-----------------------------|-----------|
|          | T <sub>N</sub> cells (%)            | T <sub>CM</sub> cells (%) | T <sub>EM</sub> cells (%) | T <sub>EMRA</sub> cells (%) | T <sub>N</sub> cells (%)            | T <sub>CM</sub> cells (%) | T <sub>EM</sub> cells (%) | T <sub>EMRA</sub> cells (%) |           |
| 1        | 2.80                                | 6.69                      | 2.88                      | 0.79                        | 0.14                                | 0.30                      | 0                         | 0.34                        | 952       |
| 2        | N/A                                 | N/A                       | N/A                       | N/A                         | N/A                                 | N/A                       | N/A                       | N/A                         | 167       |
| 3        | 5.45                                | 36.20                     | 18.60                     | 2.35                        | 0.09                                | 0.71                      | 0                         | 0                           | 586       |
| 4        | 2.43                                | 2.13                      | 2.88                      | 2.65                        | 0                                   | 0.16                      | 0                         | 0.42                        | 125       |
| 5        | 2.21                                | 4.00                      | 1.18                      | 2.54                        | 0.26                                | 0.57                      | 0                         | 0.37                        | 144       |
| 6        | N/A                                 | N/A                       | N/A                       | N/A                         | N/A                                 | N/A                       | N/A                       | N/A                         | 248       |
| 7        | 6.67                                | 14.50                     | 8.34                      | 5.63                        | 0.20                                | 0.34                      | 0.55                      | 0                           | 246       |
| 8        | 4.31                                | 2.74                      | 2.73                      | 2.49                        | 2.95                                | 9.94                      | 18.40                     | 1.75                        | 68        |
| 9        | N/A                                 | N/A                       | N/A                       | N/A                         | N/A                                 | N/A                       | N/A                       | N/A                         | 220       |
| 10       | 1.81                                | 1.09                      | 1.11                      | 0.76                        | 0.66                                | 1.96                      | 2.45                      | 8.49                        | 43        |
| 11       | 2.09                                | 0.73                      | 0.76                      | 1.62                        | 0.67                                | 1.47                      | 2.86                      | 0                           | 74        |
| 12       | 1.47                                | 0.63                      | 0.51                      | 1.43                        | 0.07                                | 0                         | 0                         | 0                           | 281       |
| 13       | 1.12                                | 0.62                      | 0.76                      | 0.73                        | 0.05                                | 0                         | 0.38                      | 0                           | 45        |
| 14       | 1.73                                | 13.50                     | 1.09                      | 1.34                        | 0.44                                | 1.05                      | 1.62                      | 0.63                        | 216       |
| 15       | 1.56                                | 2.19                      | 0.66                      | 1.64                        | 0.35                                | 0.56                      | 2.33                      | 2.66                        | 803       |
| 16       | 3.59                                | 1.68                      | 1.50                      | 3.47                        | 0.17                                | 0.24                      | 0.69                      | 0                           | 45        |

|    |      |      |      |      |      |       |       |      |     |
|----|------|------|------|------|------|-------|-------|------|-----|
| 17 | 2.29 | 1.15 | 3.69 | 4.55 | 0.53 | 0.88  | 1.69  | 1.79 | 630 |
| 18 | 5.16 | 4.30 | 2.38 | 3.34 | 1.84 | 2.31  | 2.43  | 4.60 | 48  |
| 19 | 3.30 | 1.29 | 3.34 | 2.74 | 3.37 | 21.90 | 12.80 | 2.09 | 133 |
| 20 | 4.13 | 1.67 | 2.15 | 4.58 | 0.03 | 0.11  | 0     | 0.51 | 527 |
| 21 | 2.87 | 2.40 | 1.98 | 3.12 | 0.19 | 0.50  | 0.42  | 2.02 | 161 |

**Supplementary Table I.** *Percentage of PD-L1-expressing T cell subsets and overall survival (OS) among 21 patients.*

| Case no. | Cancer type    | ICI           | PD-L1 <sup>+</sup> CD14 <sup>+</sup> monocytes (%) | OS (days) |
|----------|----------------|---------------|----------------------------------------------------|-----------|
| 22       | NSCLC          | Nivolumab     | 51.3                                               | 134       |
| 23       | GC             | Nivolumab     | 3.62                                               | 304       |
| 24       | NSCLC          | Nivolumab     | 6.22                                               | 319       |
| 25       | NSCLC          | Nivolumab     | 4.85                                               | 304       |
| 26       | GC             | Nivolumab     | 2.57                                               | 131       |
| 27       | Melanoma       | Nivolumab     | 21.6                                               | 283       |
| 28       | GC             | Nivolumab     | 2.17                                               | 53        |
| 29       | GC             | Nivolumab     | 1.0                                                | 216       |
| 30       | GC             | Nivolumab     | 13.6                                               | 174       |
| 31       | Parotid cancer | Nivolumab     | 11.0                                               | 91        |
| 32       | NCSLC          | Pembrolizumab | 4.1                                                | 221       |

**Supplementary Table II.** *Sample information of additional 11 patients*

GC: gastric cancer; ICI: immune checkpoint inhibitor; NSCLC: non-small cell lung cancer.

| Case no. | Cancer type | ICI           | CD4+/FOXP3+ Tregs (%) | OS (days) |
|----------|-------------|---------------|-----------------------|-----------|
| 1        | NSCLC       | Nivolumab     | 1.42                  | 952       |
| 5        | GC          | Nivolumab     | 2.13                  | 144       |
| 7        | NSCLC       | Nivolumab     | 1.42                  | 246       |
| 8        | GC          | Nivolumab     | 0.46                  | 68        |
| 11       | GC          | Nivolumab     | 0.98                  | 74        |
| 12       | GC          | Nivolumab     | 1.17                  | 281       |
| 13       | GC          | Nivolumab     | 0.45                  | 45        |
| 15       | NSCLC       | Pembrolizumab | 0.95                  | 803       |
| 16       | NSCLC       | Pembrolizumab | 1.22                  | 45        |
| 17       | NSCLC       | Pembrolizumab | 0.96                  | 630       |
| 18       | NCSLC       | Pembrolizumab | 1.28                  | 48        |
| 19       | NCSLC       | Pembrolizumab | 0.22                  | 133       |
| 20       | BLDC        | Pembrolizumab | 0.57                  | 527       |
| 21       | NCSLC       | Pembrolizumab | 0.46                  | 161       |
| 22       | NCSLC       | Nivolumab     | 2.41                  | 134       |
| 24       | NCSLC       | Nivolumab     | 0.49                  | 319       |
| 25       | NCSLC       | Nivolumab     | 0.68                  | 304       |
| 27       | Melanoma    | Nivolumab     | 0.61                  | 283       |
| 28       | GC          | Nivolumab     | 0.62                  | 53        |
| 32       | NCSLC       | Pembrolizumab | 1.11                  | 221       |

**Supplementary Table III.** *Percentage of CD4+/FOXP3+ regulatory T cells (Tregs) and overall survival (OS) among 20 patients.*

BLDC: Bladder cancer; GC: gastric cancer; ICI: immune checkpoint inhibitor; NSCLC: non-small cell lung cancer.

## **Supplementary Materials and Methods**

*CD4 and FOXP3 staining for flow cytometry analysis.* For CD4 and FOXP3 staining,  $1 \times 10^6$  PBMCs were stained with 7-AAD and anti-CD4 PE-Cy7-conjugated antibody (Mouse Anti-Human CD4, Becton, Dickinson and Company) at 4°C for 30 min. After washing, cell suspension was fixed and permeabilized with Transcription Factor Buffer Set (Becton, Dickinson and Company) in accordance with the manufacturer instructions. Cells were then washed and incubated twice with anti-CD4 Alexa Fluor 647-conjugated antibody (Mouse Anti-Human FoxP3, Becton, Dickinson and Company) at 4°C for 40 min.
